# Supplementary material for: Toxoplasmosis in Transplant Recipients, Europe, 2010–2014
Source: PubMed Central journal article supplement (PMC6056100; doi:10.3201/eid2408.180045), 2018-08
Supplement: 18-0045-Techapp-s1.pdf [file 18-0045-Techapp-s1.pdf]

# Toxoplasmosis in Transplant Recipients, Europe, 2010–2014

## Technical Appendix

**Technical Appendix Table.** Characteristics among responding countries

| Characteristic                                                          | Country       |                         |               |                         |               |             |              |             |             |                         |                |
|-------------------------------------------------------------------------|---------------|-------------------------|---------------|-------------------------|---------------|-------------|--------------|-------------|-------------|-------------------------|----------------|
|                                                                         | France        | Spain                   | Italy         | Switzerland             | Romania       | Serbia      | Germany      | Slovaquia   | Greece      | Turkey                  | United Kingdom |
| No of participating centers                                             | 6             | 8                       | 10            | 6                       | 2             | 2           | 1            | 3           | 1           | 2                       | 5              |
| Annual No of grafts <sup>a</sup> , responding centers/whole country (%) |               |                         |               |                         |               |             |              |             |             |                         |                |
| Allo-HSC                                                                | 320/1900 (17) | 60/900 (6)              | 136/1630 (8)  | 226 (100)               | 35/35 (100)   | 13/13 (100) | 155/3141 (5) | 50/50 (100) | Un          | 40/1180 (4)             | 250/1678 (15)  |
| Liver                                                                   | 346/1241 (28) | 307/1100 (28)           | 182/1000 (18) | 40/100 (40)             | 120/120 (100) | Na          | Un           | Na          | 35/35 (100) | 113/670 (17)            | 272/710 (38)   |
| Kidney                                                                  | 635/3232 (20) | 663/2550 (26)           | 157/1600 (10) | 80/280 (29)             | 130/310 (42)  | 30/75 (40)  | Un           | 80/150 (53) | 40/55 (73)  | 141/1702 (8)            | 560/3064 (18)  |
| Heart                                                                   | 93/420 (22)   | 105/250 (42)            | 81/230 (35)   | 12/35 (33)              | Un            | 5/10 (50)   | Un           | 10/18 (56)  | 0/9 (0)     | 6/85 (7)                | 82/190 (41)    |
| No of reported cases                                                    | 58            | 4                       | 8             | 3                       | 1             | 6           | 3            | 4           | 0           | 0                       | 0              |
| No of asymptomatic cases                                                | 23            | 0                       | 3             | 1                       | 0             | 4           | 0            | 0           | Na          | Na                      | Na             |
| No of cases/1000 grafts <sup>b</sup>                                    |               |                         |               |                         |               |             |              |             |             |                         |                |
| Allo-HSC                                                                | 26.2          | 0                       | 11.2          | 0                       | Un            | 92.3        | 3.9          | Un          | Un          | Na                      | Na             |
| Liver                                                                   | 2.9           | 1.3                     | Un            | 4                       | Un            | Un          | Un           | Un          | 0           | Na                      | Na             |
| Kidney                                                                  | 2.2           | 0                       | 9             | 0                       | 1.5           | 0           | Un           | Un          | 0           | Na                      | Na             |
| Heart                                                                   | 8.6           | 8.3                     | 3.2           | 5.7                     | Un            | 0           | Un           | 80          | Un          | Na                      | Na             |
| Cotrimoxazole preferred regimen                                         |               |                         |               |                         |               |             |              |             |             |                         |                |
| Allo-HSC                                                                | 960mgx3/wk    | 960mgx3/wk <sup>c</sup> | 960mgx3/wk    | 960mgx3/wk              | 960mgx3/wk    | 480mgx3/wk  | 480mgx2/wk   | 960mgx3/wk  | Un          | 960mgx3/wk <sup>c</sup> | 960mgx3/wk     |
| Liver                                                                   | 960mgx3/wk    | 480 mg/d                | 480 mg/d      | 960mgx3/wk              | Na            | Na          | Un           | Na          | 480 mg/d    | 960mgx3/wk <sup>d</sup> | 480mgx3/wk     |
| Kidney                                                                  | 480 mg/d      | 480 mg/d                | 480 mg/d      | 960mgx3/wk <sup>d</sup> | Na            | 960 mg/d    | Un           | 480 mg/d    | 480mgx3/wk  | 480 mg/d                | 480mgx3/wk     |
| Heart                                                                   | 960mgx3/wk    | 480 mg/d                | 960mgx3/wk    | 960mgx3/wk              | Un            | 960mgx3/wk  | Un           | 480mgx3/wk  | 480mgx3/wk  | 480 mg/d                | 960mgx3/wk     |
| Seroprevalence, %                                                       | 50            | 30                      | 50            | 35                      | 60            | 31          | 50           | 50          | 30          | 47                      | 20             |
| Pretransplant serology <sup>e</sup>                                     |               |                         |               |                         |               |             |              |             |             |                         |                |

| Characteristic | Country |       |       |             |         |        |         |           |        |        |                |
|----------------|---------|-------|-------|-------------|---------|--------|---------|-----------|--------|--------|----------------|
|                | France  | Spain | Italy | Switzerland | Romania | Serbia | Germany | Slovaquia | Greece | Turkey | United Kingdom |
| Allo-HSC       | 5/5     | 3/3   | 5/5   | 3/3         | 1/1     | 1/1    | 1/1     | 0/2       | Un     | 1/1    | 4/4            |
| Liver          | 5/5     | 7/7   | 3/5   | 3/3         | 1/1     | Na     | Un      | Na        | 1/1    | 2/2    | 2/2            |
| Kidney         | 6/6     | 7/7   | 4/6   | 6/6         | 1/1     | 1/1    | Un      | 1/2       | 1/1    | 2/2    | 2/3            |
| Heart          | 5/5     | 6/6   | 4/4   | 3/3         | Na      | 1/1    | Un      | 1/1       | 1/1    | 1/1    | 3/4            |

<sup>a</sup> mean transplantation activity over the study period (2010–2014); <sup>b</sup> number of cases divided by the number of grafts in the centers that participated to case report, cumulative data over the study period (2010–2014); <sup>c</sup> minimal doses or intakes; <sup>d</sup> or 480 mg/d indifferently; <sup>e</sup> No of centers with screening/no of centers dealing with the type of transplant

Un, unknown data (no participating center or no participation in case report); Na, not applicable (no such transplantation in the country); wk, week; d, day.
